# Supplementary material
Source: Research Square preprint supplement (doi:10.21203/rs.3.rs-10319118/v1)
Supplement: Supplementary file 1 [file bee74d1e3fbd518569aa0e31.docx]

Supplementary Materials

Ian Mwangi Nderitu1,2; [Geoffrey O. Bosire](https://pubmed.ncbi.nlm.nih.gov/?term=Bosire+GO&cauthor_id=38294243) [2](https://pubmed.ncbi.nlm.nih.gov/38294243/#full-view-affiliation-2) ; Tanga, M. Chrysantus1 [John M. Onyari](https://pubmed.ncbi.nlm.nih.gov/?term=Onyari+JM&cauthor_id=38294243)2; Abdou Tenkouano1 and Merid Negash Getahun*1

1. International Centre of Insect Physiology and Ecology (*icipe*).
2. University of Nairobi, Department of Chemistry

Stereochemical Tuning of Olfactory Signaling Enhances Black Soldier Fly Reproductive Efficiency

**Running title**: Enhancing BSF Reproduction Through Olfactory Signaling

mgetahun@icipe.org

**SUPPLEMENTARY DATA**

Supplementary table 1. Mean concentrations of candidate pheromones identified in Hermetia illucens bodywash extracts (n = 4)

|  | | | Mean concentrations detected (ng/insect ± SE) | | | |
| --- | --- | --- | --- | --- | --- | --- |
| RT | Compounds | Class | Virgin female | Mated female | Virgin male | Mated male |
| 16.75 | Decanoic acid | Fatty acid | 414.94± 123.32a | 431.80 ±79.10a | 196.85 ±47.51a | NA |
| 18.34 | 2,4- DTBP | Phenol | 48.50 ± 5.49a | 64.10±3.43a | 61.32 ± 7.37a | 54.39 ± 4.39a |
| 19.75 | Dodecanoic  acid | Fatty acid | 12000.63 ±  3111.03a | 3765.48  ± 1448.39b | 4774.77±1223.36ab | 1250.16 ±232.83b |
| 21.35 | Tetradecanoic  acid | Fatty acid | 1205.40 ±  504.84a | 92.50 ± 12.47a | 687.34±210.43a | 270.88 ±110.78a |
| 23.18 | Palmitoleic  acid | Fatty acid | 1074.24  ± 322.33a | NA | 494.53 ±137.34a | NA |
| 23.49 | Hexadecanoic  acid | Fatty acid | 2730.32 ±793.63a | 1667.92 ±548.94a | 1354.47 ±365.36a | 735.63 ±204.15a |
| 25.12 | Oleic acid | Fatty acid | 3910.16 ±1196.67a | 1938.76 ±646.61a | 2181.20 ±660.44a | NA |
| 25.21 | Octadecanoic  acid | Fatty acid | 1933.15 ±1570.64a | 444.72 ±66.99a | NA | 219.38 ±30.12b |
| 25.65 | Linoleic acid | Fatty acid | 219.59 ±81.60 | NA | NA | NA |

Supplementary table 2. Courtship latency and mating duration (seconds) across 12 chemical (candidate pheromones) treatments at 0 (Control), 0.5, 1.0, 1.5, 2.0, 2.5, 3.0, 3.5, and 4.0 µg/ml concentrations.

| Treatment | Concentration (µg/ml) | Courtship Latency (s) | Mating Duration (s) |
| --- | --- | --- | --- |
| (+)-Cedrol | 0.5 µg/ml | 824 | 1703 |
|  | 1.0 µg/ml | 1648 | 2327 |
|  |  | 1775 | 2532 |
|  |  | 482 | 2237 |
|  |  | 293 | 1600 |
|  | 1.5 µg/ml | 1637 | 2753 |
|  |  | 684 | 1760 |
|  | 2.0 µg/ml | 714 | 1265 |
|  |  | 1148 | 1463 |
|  | 2.5 µg/ml | 465 | 1052 |
|  |  | 553 | 1237 |
|  | 3.0 µg/ml | 1548 | 1994 |
|  | 3.5 µg/ml | 1784 | 1471 |
|  | 4.0 µg/ml | 1343 | 1452 |
|  |  | 1459 | 1219 |
|  | Control | 494 | 1424 |
| α-Cedrene | 0.5 µg/ml | 564 | 1242 |
|  |  | 1387 | 1771 |
|  |  | 944 | 1640 |
|  |  | 750 | 2477 |
|  | 1.0 µg/ml | 1173 | 1805 |
|  |  | 1276 | 955 |
|  |  | 1117 | 1651 |
|  |  | 1399 | 1251 |
|  |  | 1045 | 1123 |
|  | 1.5 µg/ml | 974 | 1451 |
|  |  | 408 | 1703 |
|  |  | 631 | 1571 |
|  |  | 1280 | 1803 |
|  | 2.0 µg/ml | 1760 | 1862 |
|  |  | 296 | 1343 |
|  | 2.5 µg/ml | 1752 | 1170 |
|  |  | 425 | 1676 |
|  |  | 650 | 1211 |
|  |  | 610 | 1460 |
|  |  | 1389 | 1182 |
|  |  | 1193 | 1698 |
|  |  | 1614 | 1833 |
|  |  | 831 | 1106 |
|  |  | 574 | 1722 |
|  | 3.0 µg/ml | 716 | 1510 |
|  |  | 489 | 1171 |
|  |  | 1272 | 1943 |
|  |  | 751 | 1693 |
|  |  | 810 | 1246 |
|  |  | 631 | 1683 |
|  |  | 357 | 1814 |
|  |  | 540 | 1338 |
|  |  | 761 | 1470 |
|  |  | 312 | 1236 |
|  |  | 985 | 1820 |
|  |  | 1324 | 1791 |
|  |  | 216 | 1938 |
|  |  | 1251 | 2252 |
|  |  | 1032 | 2141 |
|  |  | 927 | 2204 |
|  | 3.5 µg/ml | 631 | 1190 |
|  |  | 289 | 965 |
|  |  | 1164 | 1412 |
|  |  | 1372 | 1750 |
|  |  | 707 | 1075 |
|  |  | 289 | 965 |
|  | 4.0 µg/ml | 1430 | 1481 |
|  |  | 865 | 1866 |
|  |  | 1338 | 1251 |
|  |  | 929 | 1944 |
|  | Control | 856 | 1604 |
|  |  | 1365 | 1403 |
|  |  | 1275 | 1219 |
|  |  | 1435 | 1185 |
| Hexyl butanoate | 1.0 µg/ml | 1213 | 1507 |
|  | 1.5 µg/ml | 365 | 1186 |
|  |  | 678 | 1130 |
|  | 2.0 µg/ml | 1367 | 1078 |
|  |  | 1546 | 1596 |
|  |  | 804 | 963 |
|  |  | 1046 | 1274 |
|  | 2.5 µg/ml | 513 | 1388 |
|  |  | 587 | 1091 |
|  | 3.0 µg/ml | 335 | 1007 |
|  | 3.5 µg/ml | 434 | 1022 |
|  | 4.0 µg/ml | 980 | 1461 |
|  | Control | 553 | 2424 |
|  |  | 1179 | 1085 |
| Dihydro-β-ionone | 1.0 µg/ml | 708 | 920 |
|  |  | 589 | 1101 |
|  | 2.5 µg/ml | 986 | 1329 |
|  | 3.0 µg/ml | 351 | 1810 |
|  | 3.5 µg/ml | 863 | 1084 |
|  |  | 892 | 1357 |
|  |  | 1339 | 1752 |
|  |  | 304 | 788 |
|  | 4.0 µg/ml | 730 | 899 |
|  | Control | 1766 | 1565 |
|  |  | 1365 | 1403 |
| β-Cedrene | 2.5 µg/ml | 1489 | 1624 |
|  |  | 983 | 1333 |
|  | 4.0 µg/ml | 861 | 1247 |
|  | Control | 484 | 1195 |
|  |  | 1531 | 1896 |
|  |  | 739 | 1211 |
| Nonanal | 0.5 µg/ml | 1350 | 1542 |
|  | 1.0 µg/ml | 1610 | 1482 |
|  |  | 1264 | 1345 |
|  | 1.5 µg/ml | 344 | 1406 |
|  |  | 1204 | 1714 |
|  | 2.0 µg/ml | 212 | 1204 |
|  |  | 1170 | 1376 |
|  | 2.5 µg/ml | 1409 | 1940 |
|  |  | 1251 | 1801 |
|  | 3.0 µg/ml | 1199 | 1228 |
|  |  | 1044 | 1351 |
|  | 3.5 µg/ml | 489 | 1431 |
|  | 4.0 µg/ml | 941 | 1959 |
|  | Control | 955 | 2225 |
| Decanal | 0.5 µg/ml | 871 | 1373 |
|  | 1.5 µg/ml | 1526 | 1805 |
|  |  | 912 | 1696 |
|  | 1.0 µg/ml | 721 | 1461 |
|  | 2.0 µg/ml | 1090 | 1774 |
|  | 3.0 µg/ml | 1363 | 1544 |
| Palmitoleic acid | 3.5 µg/ml | 340 | 1157 |
| Dodecanoic acid | 0.5 µg/ml | 922 | 1810 |
|  |  | 1601 | 1492 |
|  | 1.0 µg/ml | 387 | 1134 |
|  | 2.5 µg/ml | 964 | 1196 |
|  | 3.0 µg/ml | 618 | 1167 |
|  |  | 530 | 970 |
|  | 4.0 µg/ml | 889 | 1222 |
|  |  | 822 | 1264 |
|  | Control | 1767 | 1612 |
| Oleic acid | 0.5 µg/ml | 1355 | 1491 |
|  | 1.5 µg/ml | 1155 | 1641 |
|  | 2.0 µg/ml | 400 | 697 |
|  |  | 532 | 1863 |
|  | 2.5 µg/ml | 1751 | 1466 |
|  | 3.0 µg/ml | 305 | 2332 |
|  | 3.5 µg/ml | 584 | 1582 |
|  | Control | 967 | 1903 |
| Linoleic acid | 0.5 µg/ml | 1115 | 1675 |
|  | 1.5 µg/ml | 471 | 2000 |
|  |  | 504 | 1291 |
|  |  | 428 | 689 |
|  | 2.0 µg/ml | 869 | 1152 |
|  | 2.5 µg/ml | 1521 | 1251 |
|  |  | 390 | 1587 |
|  | 3.0 µg/ml | 285 | 943 |
|  |  | 358 | 1051 |
|  | 3.5 µg/ml | 1095 | 1144 |
|  | 4.0 µg/ml | 520 | 1108 |
|  |  | 1623 | 1160 |
|  |  | 826 | 1353 |
|  |  | 602 | 1009 |
|  |  | 1114 | 1074 |
|  |  | 871 | 1304 |
|  | Control | 994 | 1297 |
|  |  | 383 | 1117 |
|  |  | 427 | 1902 |
| Decanoic acid | 0.5 µg/ml | 1340 | 1864 |
|  | 1.0 µg/ml | 1392 | 2175 |
|  |  | 1559 | 2748 |
|  | 1.5 µg/ml | 1500 | 842 |
|  |  | 503 | 2174 |
|  |  | 933 | 1507 |
|  |  | 1168 | 1752 |
|  |  | 1065 | 1733 |
|  | 2.0 µg/ml | 815 | 1386 |
|  | 2.5 µg/ml | 136 | 1009 |
|  | 3.0 µg/ml | 1774 | 1421 |
|  |  | 450 | 1600 |
|  | 3.5 µg/ml | 724 | 1405 |
|  |  | 1498 | 654 |
|  |  | 1652 | 878 |
|  |  | 1048 | 2439 |
|  | 4.0 µg/ml | 631 | 784 |
|  |  | 362 | 1324 |
|  |  | 1416 | 1696 |
|  |  | 516 | 2648 |
|  | Control | 1602 | 1368 |
|  |  | 812 | 1641 |
|  |  | 608 | 1933 |
|  |  | 503 | 1683 |

Supplementary table 3. Odds ratios (OR) of mating success for 12 candidate pheromones (0.5, 1.0, 1.5, 2.0, 2.5, 3.0, 3.5, and 4.0 µg/mL) versus control (reference), with 95% confidence intervals (CI), and associated p-values.

| Compound | Concentration | Mated | Total | Un-mated | OR | CI lower | CI upper | *p*-value |
| --- | --- | --- | --- | --- | --- | --- | --- | --- |
| α-Cedrene | 0.5 | 4 | 30 | 26 | 1 | 0.226 | 4.4315 | 1 |
| α-Cedrene | 1 | 5 | 30 | 25 | 1.3 | 0.313 | 5.4043 | 1 |
| α-Cedrene | 1.5 | 4 | 30 | 26 | 1 | 0.226 | 4.4315 | 1 |
| α-Cedrene | 2 | 2 | 30 | 28 | 0.464 | 0.078 | 2.7514 | 0.7 |
| α-Cedrene | 2.5 | 9 | 30 | 21 | 2.786 | 0.751 | 10.332 | 0.2 |
| α-Cedrene | 3 | 16 | 30 | 14 | 7.429 | 2.078 | 26.554 | 0 |
| α-Cedrene | 3.5 | 6 | 30 | 24 | 1.625 | 0.408 | 6.4688 | 0.7 |
| α-Cedrene | 4 | 4 | 30 | 26 | 1 | 0.226 | 4.4315 | 1 |
| β-Cedrene | 0.5 | 0 | 30 | 30 | 0.097 | 0.005 | 1.8776 | 0.1 |
| β-Cedrene | 1 | 0 | 30 | 30 | 0.097 | 0.005 | 1.8776 | 0.1 |
| β-Cedrene | 1.5 | 0 | 30 | 30 | 0.097 | 0.005 | 1.8776 | 0.1 |
| β-Cedrene | 2 | 0 | 30 | 30 | 0.097 | 0.005 | 1.8776 | 0.1 |
| β-Cedrene | 2.5 | 2 | 30 | 28 | 0.464 | 0.078 | 2.7514 | 0.7 |
| β-Cedrene | 3 | 0 | 30 | 30 | 0.097 | 0.005 | 1.8776 | 0.1 |
| β-Cedrene | 3.5 | 0 | 30 | 30 | 0.097 | 0.005 | 1.8776 | 0.1 |
| β-Cedrene | 4 | 1 | 30 | 29 | 0.224 | 0.024 | 2.1359 | 0.4 |
| Decanal | 0.5 | 1 | 30 | 29 | 0.224 | 0.024 | 2.1359 | 0.4 |
| Decanal | 1 | 1 | 30 | 29 | 0.224 | 0.024 | 2.1359 | 0.4 |
| Decanal | 1.5 | 2 | 30 | 28 | 0.464 | 0.078 | 2.7514 | 0.7 |
| Decanal | 2 | 1 | 30 | 29 | 0.224 | 0.024 | 2.1359 | 0.4 |
| Decanal | 2.5 | 0 | 30 | 30 | 0.097 | 0.005 | 1.8776 | 0.1 |
| Decanal | 3 | 1 | 30 | 29 | 0.224 | 0.024 | 2.1359 | 0.4 |
| Decanal | 3.5 | 0 | 30 | 30 | 0.097 | 0.005 | 1.8776 | 0.1 |
| Decanal | 4 | 0 | 30 | 30 | 0.097 | 0.005 | 1.8776 | 0.1 |
| Decanoic acid | 0.5 | 1 | 30 | 29 | 0.224 | 0.024 | 2.1359 | 0.4 |
| Decanoic acid | 1 | 2 | 30 | 28 | 0.464 | 0.078 | 2.7514 | 0.7 |
| Decanoic acid | 1.5 | 5 | 30 | 25 | 1.3 | 0.313 | 5.4043 | 1 |
| Decanoic acid | 2 | 1 | 30 | 29 | 0.224 | 0.024 | 2.1359 | 0.4 |
| Decanoic acid | 2.5 | 1 | 30 | 29 | 0.224 | 0.024 | 2.1359 | 0.4 |
| Decanoic acid | 3 | 2 | 30 | 28 | 0.464 | 0.078 | 2.7514 | 0.7 |
| Decanoic acid | 3.5 | 4 | 30 | 26 | 1 | 0.226 | 4.4315 | 1 |
| Decanoic acid | 4 | 4 | 30 | 26 | 1 | 0.226 | 4.4315 | 1 |
| Dihydro-β-ionone | 0.5 | 0 | 30 | 30 | 0.097 | 0.005 | 1.8776 | 0.1 |
| Dihydro-β-ionone | 1 | 2 | 30 | 28 | 0.464 | 0.078 | 2.7514 | 0.7 |
| Dihydro-β-ionone | 1.5 | 0 | 30 | 30 | 0.097 | 0.005 | 1.8776 | 0.1 |
| Dihydro-β-ionone | 2 | 0 | 30 | 30 | 0.097 | 0.005 | 1.8776 | 0.1 |
| Dihydro-β-ionone | 2.5 | 1 | 30 | 29 | 0.224 | 0.024 | 2.1359 | 0.4 |
| Dihydro-β-ionone | 3 | 1 | 30 | 29 | 0.224 | 0.024 | 2.1359 | 0.4 |
| Dihydro-β-ionone | 3.5 | 4 | 30 | 26 | 1 | 0.226 | 4.4315 | 1 |
| Dihydro-β-ionone | 4 | 1 | 30 | 29 | 0.224 | 0.024 | 2.1359 | 0.4 |
| (+)-Cedrol | 0.5 | 1 | 30 | 29 | 0.224 | 0.024 | 2.1359 | 0.4 |
| (+)-Cedrol | 1 | 4 | 30 | 26 | 1 | 0.226 | 4.4315 | 1 |
| (+)-Cedrol | 1.5 | 2 | 30 | 28 | 0.464 | 0.078 | 2.7514 | 0.7 |
| (+)-Cedrol | 2 | 2 | 30 | 28 | 0.464 | 0.078 | 2.7514 | 0.7 |
| (+)-Cedrol | 2.5 | 2 | 30 | 28 | 0.464 | 0.078 | 2.7514 | 0.7 |
| (+)-Cedrol | 3 | 1 | 30 | 29 | 0.224 | 0.024 | 2.1359 | 0.4 |
| (+)-Cedrol | 3.5 | 1 | 30 | 29 | 0.224 | 0.024 | 2.1359 | 0.4 |
| (+)-Cedrol | 4 | 2 | 30 | 28 | 0.464 | 0.078 | 2.7514 | 0.7 |
| Hexyl butanoate | 0.5 | 0 | 30 | 30 | 0.097 | 0.005 | 1.8776 | 0.1 |
| Hexyl butanoate | 1 | 1 | 30 | 29 | 0.224 | 0.024 | 2.1359 | 0.4 |
| Hexyl butanoate | 1.5 | 2 | 30 | 28 | 0.464 | 0.078 | 2.7514 | 0.7 |
| Hexyl butanoate | 2 | 4 | 30 | 26 | 1 | 0.226 | 4.4315 | 1 |
| Hexyl butanoate | 2.5 | 2 | 30 | 28 | 0.464 | 0.078 | 2.7514 | 0.7 |
| Hexyl butanoate | 3 | 1 | 30 | 29 | 0.224 | 0.024 | 2.1359 | 0.4 |
| Hexyl butanoate | 3.5 | 1 | 30 | 29 | 0.224 | 0.024 | 2.1359 | 0.4 |
| Hexyl butanoate | 4 | 1 | 30 | 29 | 0.224 | 0.024 | 2.1359 | 0.4 |
| Dodecanoic acid | 0.5 | 2 | 30 | 28 | 0.464 | 0.078 | 2.7514 | 0.7 |
| Dodecanoic acid | 1 | 1 | 30 | 29 | 0.224 | 0.024 | 2.1359 | 0.4 |
| Dodecanoic acid | 1.5 | 0 | 30 | 30 | 0.097 | 0.005 | 1.8776 | 0.1 |
| Dodecanoic acid | 2 | 0 | 30 | 30 | 0.097 | 0.005 | 1.8776 | 0.1 |
| Dodecanoic acid | 2.5 | 1 | 31 | 30 | 0.217 | 0.023 | 2.0627 | 0.2 |
| Dodecanoic acid | 3 | 2 | 29 | 27 | 0.481 | 0.081 | 2.8574 | 0.7 |
| Dodecanoic acid | 3.5 | 0 | 30 | 30 | 0.097 | 0.005 | 1.8776 | 0.1 |
| Dodecanoic acid | 4 | 2 | 30 | 28 | 0.464 | 0.078 | 2.7514 | 0.7 |
| Linoleic acid | 0.5 | 1 | 30 | 29 | 0.224 | 0.024 | 2.1359 | 0.4 |
| Linoleic acid | 1 | 0 | 30 | 30 | 0.097 | 0.005 | 1.8776 | 0.1 |
| Linoleic acid | 1.5 | 3 | 30 | 27 | 0.722 | 0.147 | 3.5448 | 1 |
| Linoleic acid | 2 | 1 | 30 | 29 | 0.224 | 0.024 | 2.1359 | 0.4 |
| Linoleic acid | 2.5 | 2 | 30 | 28 | 0.464 | 0.078 | 2.7514 | 0.7 |
| Linoleic acid | 3 | 2 | 30 | 28 | 0.464 | 0.078 | 2.7514 | 0.7 |
| Linoleic acid | 3.5 | 1 | 30 | 29 | 0.224 | 0.024 | 2.1359 | 0.4 |
| Linoleic acid | 4 | 6 | 30 | 24 | 1.625 | 0.408 | 6.4688 | 0.7 |
| Nonanal | 0.5 | 1 | 30 | 29 | 0.224 | 0.024 | 2.1359 | 0.4 |
| Nonanal | 1 | 2 | 30 | 28 | 0.464 | 0.078 | 2.7514 | 0.7 |
| Nonanal | 1.5 | 2 | 30 | 28 | 0.464 | 0.078 | 2.7514 | 0.7 |
| Nonanal | 2 | 2 | 30 | 28 | 0.464 | 0.078 | 2.7514 | 0.7 |
| Nonanal | 2.5 | 2 | 30 | 28 | 0.464 | 0.078 | 2.7514 | 0.7 |
| Nonanal | 3 | 2 | 30 | 28 | 0.464 | 0.078 | 2.7514 | 0.7 |
| Nonanal | 3.5 | 1 | 30 | 29 | 0.224 | 0.024 | 2.1359 | 0.4 |
| Nonanal | 4 | 1 | 30 | 29 | 0.224 | 0.024 | 2.1359 | 0.4 |
| Oleic acid | 0.5 | 1 | 30 | 29 | 0.224 | 0.024 | 2.1359 | 0.4 |
| Oleic acid | 1 | 0 | 30 | 30 | 0.097 | 0.005 | 1.8776 | 0.1 |
| Oleic acid | 1.5 | 1 | 30 | 29 | 0.224 | 0.024 | 2.1359 | 0.4 |
| Oleic acid | 2 | 2 | 30 | 28 | 0.464 | 0.078 | 2.7514 | 0.7 |
| Oleic acid | 2.5 | 1 | 30 | 29 | 0.224 | 0.024 | 2.1359 | 0.4 |
| Oleic acid | 3 | 1 | 30 | 29 | 0.224 | 0.024 | 2.1359 | 0.4 |
| Oleic acid | 3.5 | 1 | 30 | 29 | 0.224 | 0.024 | 2.1359 | 0.4 |
| Oleic acid | 4 | 0 | 30 | 30 | 0.097 | 0.005 | 1.8776 | 0.1 |
| Palmitoleic acid | 0.5 | 0 | 30 | 30 | 0.097 | 0.005 | 1.8776 | 0.1 |
| Palmitoleic acid | 1 | 0 | 30 | 30 | 0.097 | 0.005 | 1.8776 | 0.1 |
| Palmitoleic acid | 1.5 | 0 | 30 | 30 | 0.097 | 0.005 | 1.8776 | 0.1 |
| Palmitoleic acid | 2 | 0 | 30 | 30 | 0.097 | 0.005 | 1.8776 | 0.1 |
| Palmitoleic acid | 2.5 | 0 | 30 | 30 | 0.097 | 0.005 | 1.8776 | 0.1 |
| Palmitoleic acid | 3 | 0 | 30 | 30 | 0.097 | 0.005 | 1.8776 | 0.1 |
| Palmitoleic acid | 3.5 | 1 | 30 | 29 | 0.224 | 0.024 | 2.1359 | 0.4 |
| Palmitoleic acid | 4 | 0 | 30 | 30 | 0.097 | 0.005 | 1.8776 | 0.1 |

Supplementary table 4. BSF egg mass (mg) laid with their corresponding BSFL emergent numbers with respect to 3.0 µg/mL α-cedrene and control treatments. n=10.

| Treatment | Replicate | Egg mass (mg) | | Emergent BSFL numbers |
| --- | --- | --- | --- | --- |
| α-cedrene | R1 | | 123.32 | 2635 |
|  | R2 | | 115.83 | 2059 |
|  | R3 | | 111.27 | 2398 |
|  | R4 | | 114.12 | 2059 |
|  | R5 | | 100.46 | 1987 |
|  | R6 | | 93.95 | 1989 |
|  | R7 | | 62.43 | 1921 |
|  | R8 | | 58 | 1304 |
|  | R9 | | 93.56 | 1364 |
|  | R10 | | 109.49 | 1641 |
| Control | R1 | | 70.41 | 804 |
|  | R2 | | 37.74 | 431 |
|  | R3 | | 74.04 | 899 |
|  | R4 | | 21.36 | 106 |
|  | R5 | | 24.77 | 265 |
|  | R6 | | 38.8 | 471 |
|  | R7 | | 43.98 | 678 |
|  | R8 | | 75.69 | 691 |
|  | R9 | | 52.15 | 681 |
|  | R10 | | 34.26 | 397 |
